# Supplementary material for: First-line treatment of chronic lymphocytic leukemia with ibrutinib plus obinutuzumab versus chlorambucil plus obinutuzumab: final analysis of the randomized, phase III iLLUMINATE trial
Source: PubMed Central journal article supplement — Haematologica. 2022 Jan 13;107(9):2108–20. doi: 10.3324/haematol.2021.279012 (PMC9425310; doi:10.3324/haematol.2021.279012), 2022-01-13
Supplement: 2021_279012_MORENO_SUPPL.pdf [file 2021_279012_MORENO_SUPPL.pdf]

# First-line treatment of chronic lymphocytic leukemia with ibrutinib plus obinutuzumab *versus* chlorambucil plus obinutuzumab: final analysis of the randomized, phase III iLLUMINATE trial

Carol Moreno,<sup>1,2</sup> Richard Greil,<sup>3</sup> Fatih Demirkan,<sup>4</sup> Alessandra Tedeschi,<sup>5</sup> Bertrand Anz,<sup>6</sup> Loree Larratt,<sup>7</sup> Martin Simkovic,<sup>8</sup> Jan Novak,<sup>9</sup> Vladimir Strugov,<sup>10</sup> Devinder Gill,<sup>11</sup> John G. Gribben,<sup>12</sup> Kevin Kwei,<sup>13</sup> Sandra Dai,<sup>13</sup> Emily Hsu,<sup>13</sup> James P. Dean<sup>13</sup> and Ian W. Flinn<sup>14</sup>

<sup>1</sup>Hospital de la Santa Creu i Sant Pau, Autonomous University of Barcelona, Barcelona, Spain; <sup>2</sup>Josep Carreras Leukemia Research Institute, Barcelona, Spain; <sup>3</sup>3rd Medical Department, Paracelsus Medical University, Salzburg Cancer Research Institute-CCCIT, Salzburg, Austria; <sup>4</sup>Dokuz Eylul University, Division of Hematology, Izmir, Turkey; <sup>5</sup>Niguarda Ca Granda Hospital, Milan, Italy; <sup>6</sup>Tennessee Oncology, Chattanooga, TN, USA; <sup>7</sup>University of Alberta Hospital, Edmonton, Alberta, Canada; <sup>8</sup>Department of Internal Medicine, Haematology, University Hospital and Medical School Hradec, Králové, Czech Republic; <sup>9</sup>University Hospital Kralovske Vinohrady and Third Faculty of Medicine, Charles University, Prague, Czech Republic; <sup>10</sup>Almazov National Medical Research Centre, St. Petersburg, Russia; <sup>11</sup>Princess Alexandra Hospital, Brisbane, Queensland, Australia; <sup>12</sup>Barts Cancer Institute, London, UK; <sup>13</sup>Pharmacyclics LLC, an AbbVie Company, Sunnyvale, CA, USA and <sup>14</sup>Sarah Cannon Research Institute, Nashville, TN, USA

**Correspondence:** C. Moreno  
[cmorenoa@santpau.cat](mailto:cmorenoa@santpau.cat)

**Received:** May 5, 2021.

**Accepted:** November 4, 2021.

**Prepublished:** January 13, 2022.

<https://doi.org/10.3324/haematol.2021.279012>

©2022 Ferrata Storti Foundation

Published under a CC BY-NC license

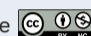

## **Supplemental Methods**

### *Statistical analysis*

PFS and OS were analyzed using Kaplan-Meier estimates and log-rank test. Rates of undetectable minimal residual disease, hematologic improvement, and overall response rate were analyzed using chi-square test. Calculations of overall survival were not censored in the chlorambucil plus obinutuzumab arm at crossover.

# Supplemental Figures and Tables

**Figure S1.** CONSORT diagram. AE, adverse event; ITT, intention-to-treat; NA, not applicable.

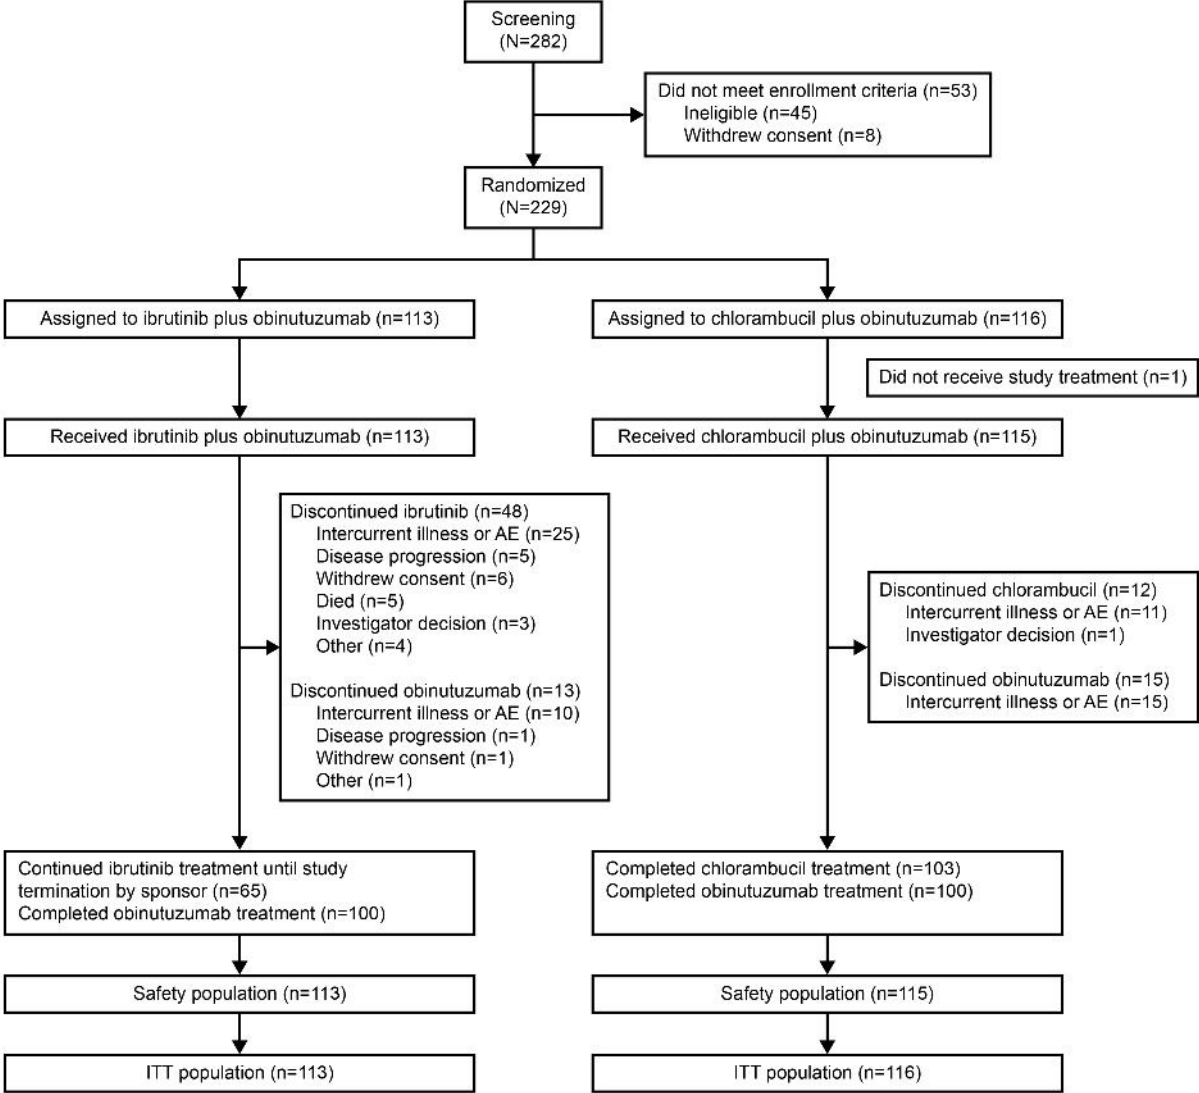

**Figure S2.** Progression-free survival per investigator assessment in the high-risk population of patients excluding del(17p) (patients with del(11q), TP53 mutations, and/or unmutated IGHV). PFS, progression-free survival.

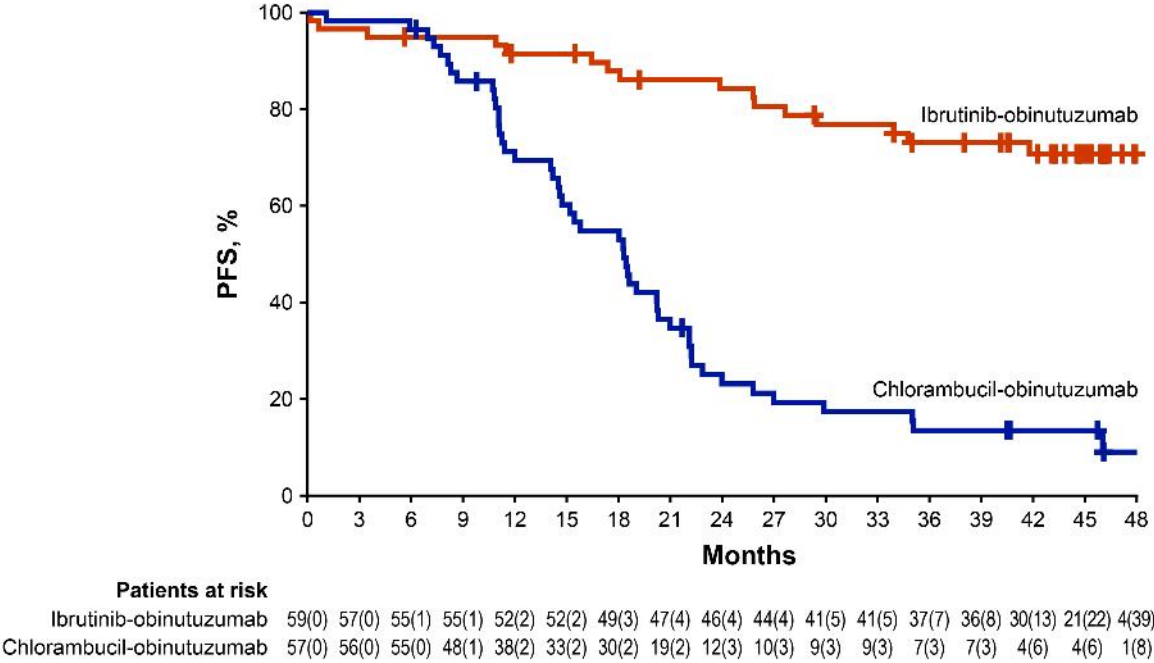

**Figure S3.** Progression-free survival per investigator assessment according to *IGHV* status, excluding patients with del(17p). PFS, progression-free survival.

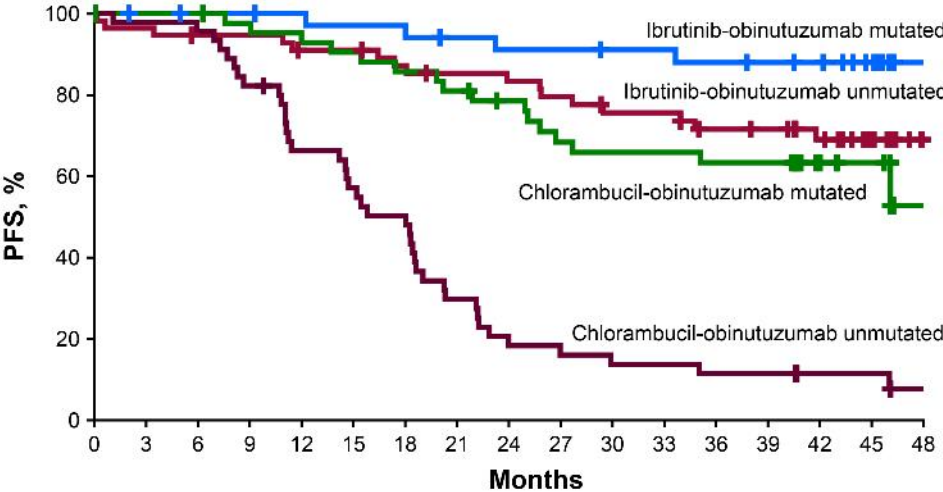

| Patients at risk                    |  | 0  | 3  | 6  | 9  | 12 | 15 | 18 | 21 | 24 | 27 | 30 | 33 | 36 | 39 | 42 | 45 | 48 |
|-------------------------------------|--|----|----|----|----|----|----|----|----|----|----|----|----|----|----|----|----|----|
| Ibrutinib-obinutuzumab mutated      |  | 37 | 36 | 35 | 35 | 34 | 33 | 33 | 31 | 30 | 30 | 29 | 29 | 28 | 27 | 26 | 22 | 11 |
| Ibrutinib-obinutuzumab unmutated    |  | 56 | 54 | 52 | 52 | 49 | 49 | 46 | 44 | 43 | 41 | 38 | 38 | 34 | 33 | 27 | 19 | 4  |
| Chlorambucil-obinutuzumab mutated   |  | 45 | 43 | 43 | 41 | 39 | 38 | 36 | 34 | 31 | 27 | 26 | 26 | 25 | 25 | 14 | 11 | 2  |
| Chlorambucil-obinutuzumab unmutated |  | 45 | 44 | 43 | 37 | 29 | 25 | 22 | 13 | 8  | 7  | 6  | 6  | 5  | 5  | 3  | 3  | 1  |

**Figure S4.** Subgroup analyses of progression-free survival. Forest plot of hazard ratios for disease progression or death across patient subgroups. CI, confidence interval; Clb, chlorambucil; ECOG PS, Eastern Cooperative Oncology Group performance status; HR, hazard ratio; Ibr, ibrutinib; Ob, obinutuzumab.

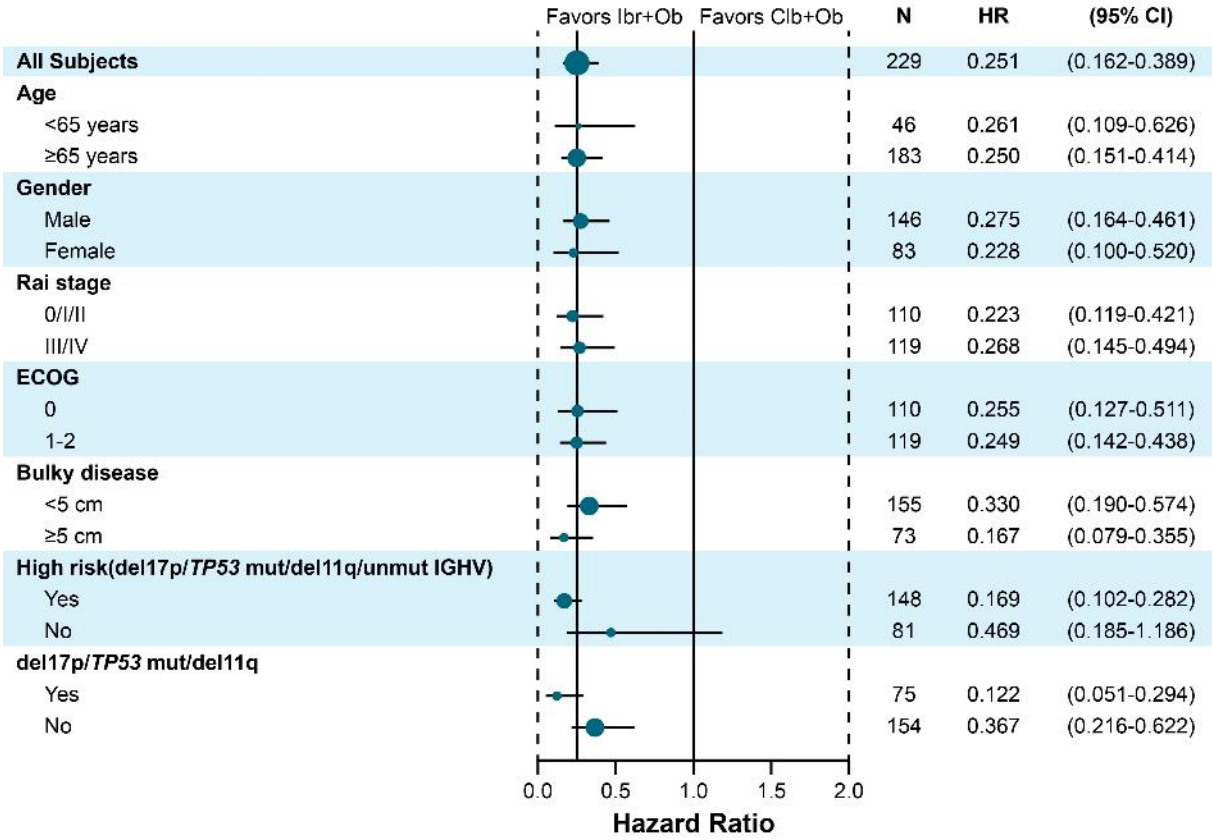

**Figure S5.** Progression-free survival (PFS) per investigator assessment according to MRD status. PFS in A) patients who remained MRD negative at last peripheral blood or bone marrow sample by follow-up time, B) patients treated with ibrutinib plus obinutuzumab, C) patients treated with chlorambucil plus obinutuzumab. CR, complete response; CRi, complete response with incomplete bone marrow recovery; MRD, minimal residual disease; nPR, nodular partial response; PR, partial response.

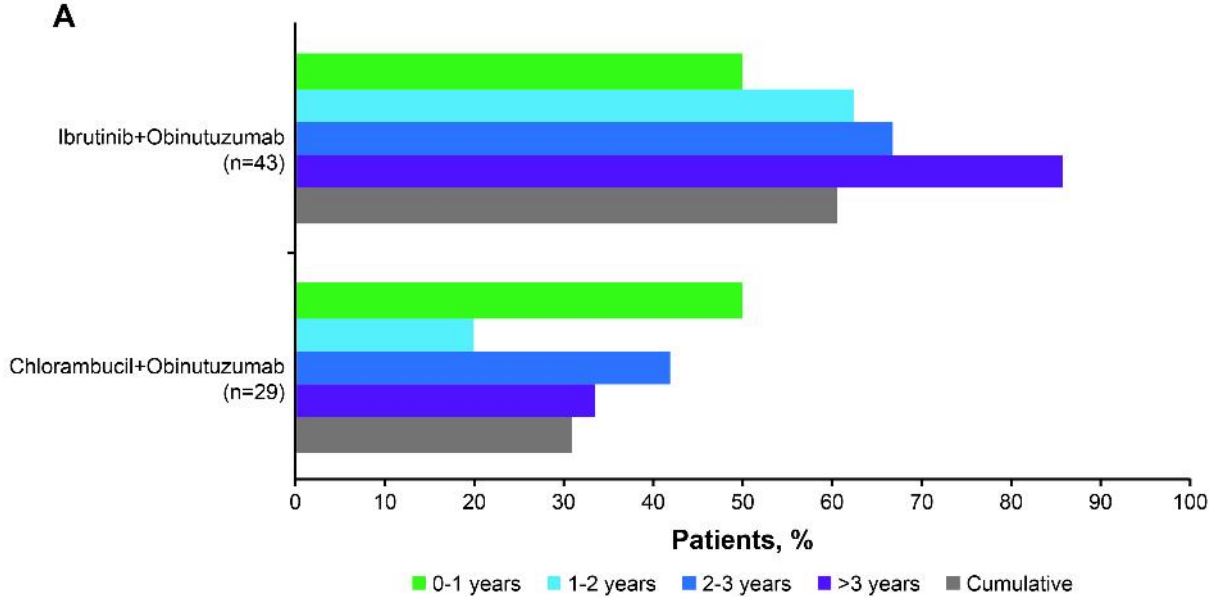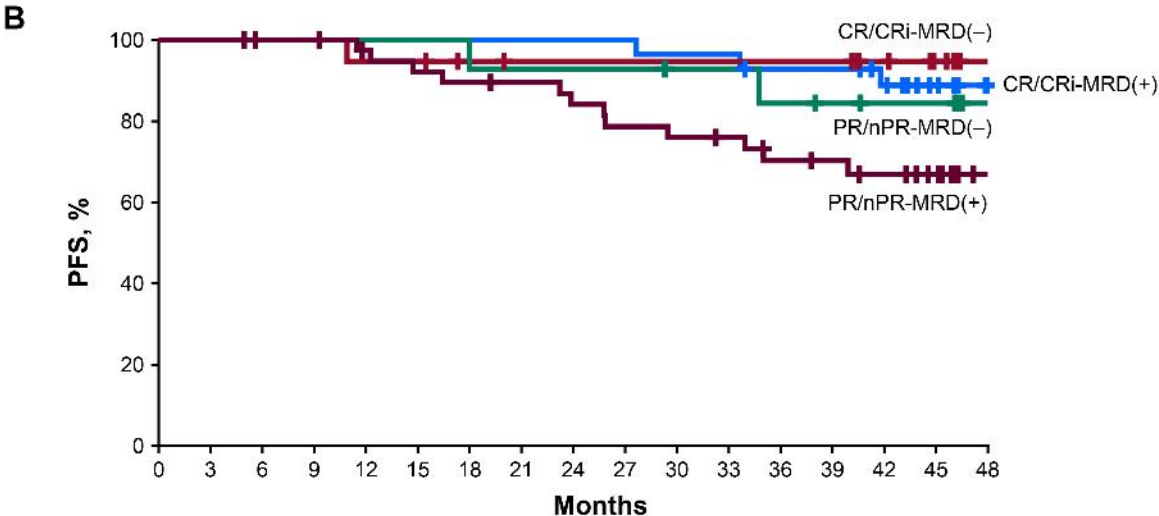

| Patients at risk | 0  | 3  | 6  | 9  | 12 | 15 | 18 | 21 | 24 | 27 | 30 | 33 | 36 | 39 | 42 | 45 | 48 |
|------------------|----|----|----|----|----|----|----|----|----|----|----|----|----|----|----|----|----|
| CR/CRi-MRD(-)    | 28 | 28 | 28 | 28 | 28 | 28 | 28 | 28 | 28 | 27 | 27 | 25 | 25 | 22 | 17 | 6  |    |
| CR/CRi-MRD(+)    | 19 | 19 | 19 | 19 | 18 | 18 | 16 | 15 | 15 | 15 | 15 | 15 | 15 | 12 | 9  | 4  |    |
| PR/nPR-MRD(-)    | 14 | 14 | 14 | 14 | 14 | 14 | 13 | 13 | 13 | 11 | 11 | 10 | 9  | 7  | 7  | 4  |    |
| PR/nPR-MRD(+)    | 42 | 42 | 40 | 40 | 37 | 35 | 34 | 33 | 31 | 29 | 28 | 27 | 24 | 21 | 18 | 14 | 3  |

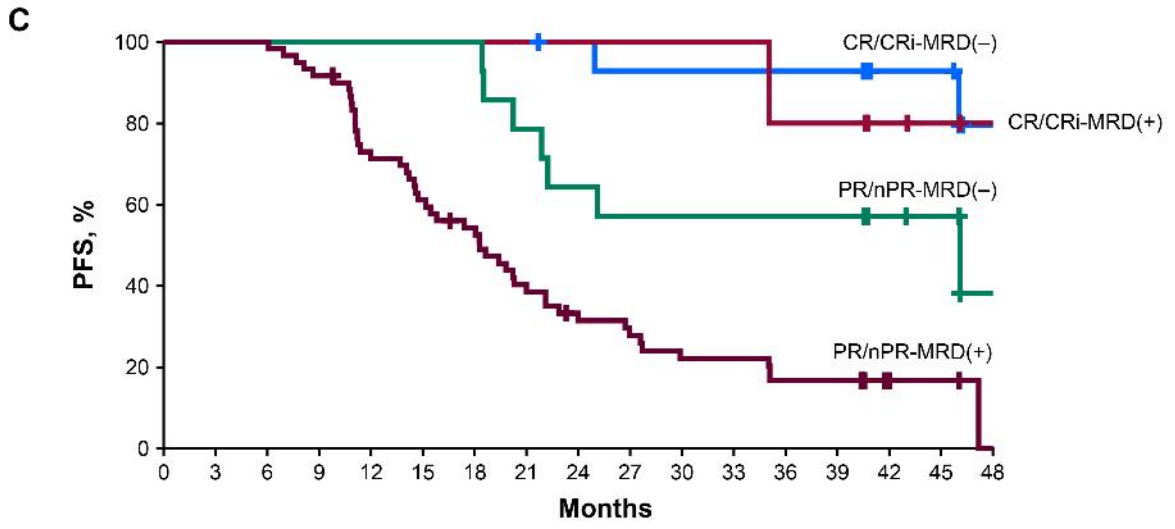

**Patients at risk**

|               |    |    |    |    |    |    |    |    |    |    |    |    |    |    |   |   |   |
|---------------|----|----|----|----|----|----|----|----|----|----|----|----|----|----|---|---|---|
| CR/CRI-MRD(-) | 15 | 15 | 15 | 15 | 15 | 15 | 15 | 15 | 14 | 13 | 13 | 13 | 13 | 13 | 8 | 8 | 3 |
| CR/CRI-MRD(+) | 5  | 5  | 5  | 5  | 5  | 5  | 5  | 5  | 5  | 5  | 5  | 4  | 4  | 2  | 1 | 0 |   |
| PR/nPR-MRD(-) | 14 | 14 | 14 | 14 | 14 | 14 | 14 | 11 | 9  | 8  | 8  | 8  | 8  | 8  | 5 | 4 | 1 |
| PR/nPR-MRD(+) | 60 | 60 | 60 | 55 | 42 | 36 | 31 | 22 | 17 | 15 | 12 | 12 | 9  | 9  | 4 | 3 | 0 |



**Figure S6.** Overall survival in patients treated with ibrutinib plus obinutuzumab versus chlorambucil plus obinutuzumab. Patients in the chlorambucil plus obinutuzumab arm were permitted to crossover to ibrutinib therapy upon disease progression; 44% of patients initially randomized to chlorambucil plus obinutuzumab received second-line therapy with ibrutinib. CI, confidence interval; NE, not estimable; OS, overall survival.

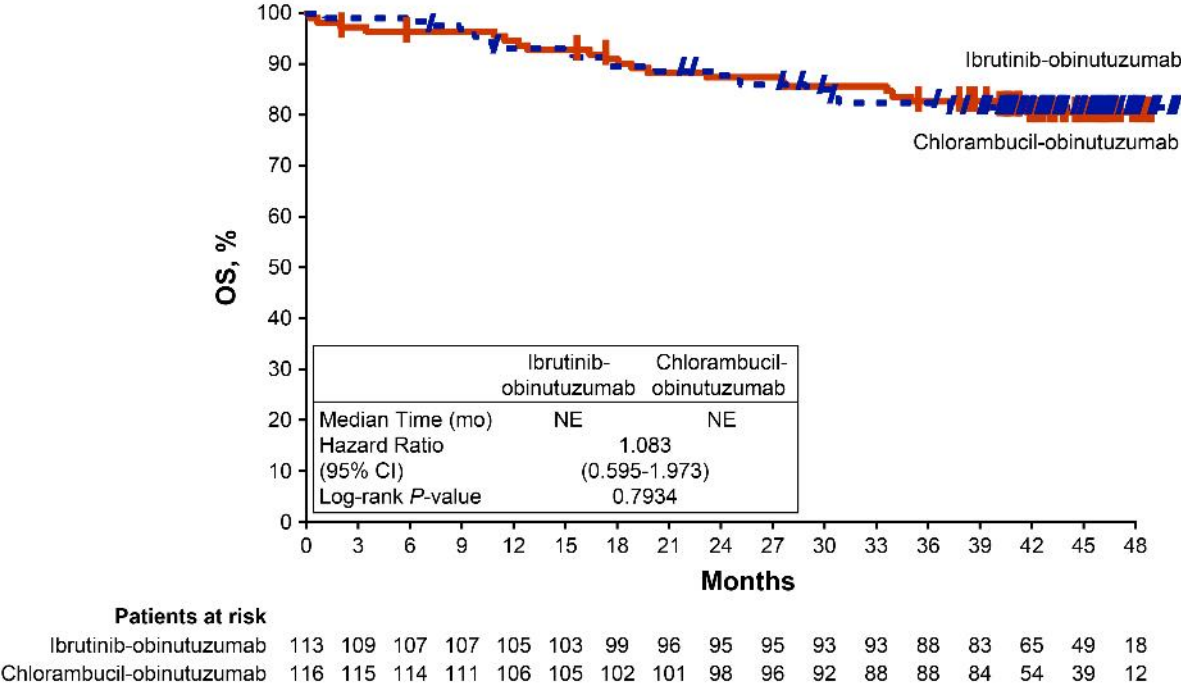

**Figure S7.** Duration and resolution status of AEs leading to ibrutinib dose reduction. Each bar depicts AE onset/grade with event duration shown in months. Bars denoted as arrows indicate AEs reported as not recovered/not resolved. Ibrutinib was reduced to 280 mg unless otherwise noted per the legend. AE, adverse event; G, grade.

<sup>a</sup>Ibrutinib 140 mg dose.

<sup>b</sup>Serious AE.

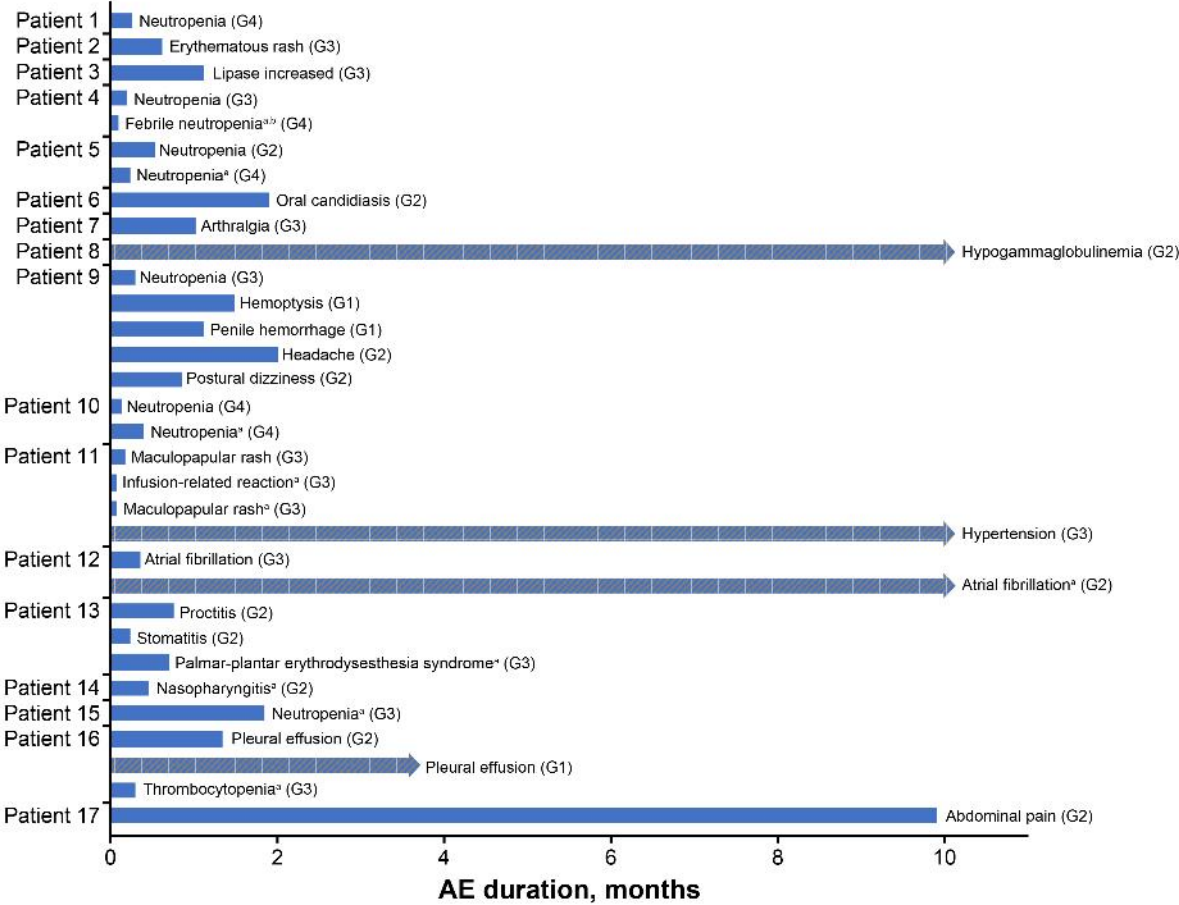

**Table S1.** Baseline patient and disease characteristics

|                                                             | <b>Ibrutinib plus<br/>obinutuzumab<br/>(N=113)</b> | <b>Chlorambucil plus<br/>obinutuzumab<br/>(N=116)</b> |
|-------------------------------------------------------------|----------------------------------------------------|-------------------------------------------------------|
| <b>Median age (range), years</b>                            | 70 (47–87)                                         | 72 (40–86)                                            |
| ≥65 years, n (%)                                            | 91 (81)                                            | 92 (79)                                               |
| <b>Male, n (%)</b>                                          | 67 (59)                                            | 79 (68)                                               |
| <b>Ethnicity n (%)</b>                                      |                                                    |                                                       |
| White                                                       | 109 (96)                                           | 111 (96)                                              |
| Black or African American                                   | 2 (2)                                              | 2 (2)                                                 |
| Asian                                                       | 1 (1)                                              | 2 (2)                                                 |
| Native Hawaiian or other Pacific Islander                   | 1 (1)                                              | 1 (1)                                                 |
| <b>ECOG performance status n (%)</b>                        |                                                    |                                                       |
| 0                                                           | 57 (50)                                            | 53 (46)                                               |
| 1                                                           | 52 (46)                                            | 56 (48)                                               |
| 2                                                           | 4 (4)                                              | 7 (6)                                                 |
| <b>Diagnosis n (%)</b>                                      |                                                    |                                                       |
| Chronic lymphocytic leukemia                                | 107 (95)                                           | 107 (92)                                              |
| Small lymphocytic lymphoma                                  | 6 (5)                                              | 9 (8)                                                 |
| <b>Rai stage III/IV, n (%)</b>                              | 60 (53)                                            | 59 (51)                                               |
| <b>Bulky disease of ≥5 cm, n (%)</b>                        | 30 (27)                                            | 44 (38)                                               |
| <b>High risk features n (%)</b>                             |                                                    |                                                       |
| del(17p), <i>TP53</i> , del(11q), or unmutated <i>IGHV</i>  | 73 (65)                                            | 75 (65)                                               |
| del(17p) or <i>TP53</i>                                     | 18 (16)                                            | 23 (20)                                               |
| del(17p)                                                    | 14 (12)                                            | 18 (16)                                               |
| <i>TP53</i> mutation <sup>a</sup>                           | 13/112 (12)                                        | 16/110 (15)                                           |
| del(11q) <sup>b</sup>                                       | 13 (12)                                            | 22 (19)                                               |
| Unmutated <i>IGHV</i>                                       | 66/107 (62)                                        | 57/107 (53)                                           |
| <b>Any cytopenia at baseline, n (%)</b>                     | 63 (56)                                            | 62 (53)                                               |
| <b>Cumulative illness rating scale for geriatrics score</b> |                                                    |                                                       |
| Median (range)                                              | 4.0 (0–12)                                         | 4.0 (1-12)                                            |
| >6, n (%)                                                   | 37 (33)                                            | 36 (31)                                               |
| <b>Creatinine clearance</b>                                 |                                                    |                                                       |
| Median, mL/min (range)                                      | 72.0 (32–151)                                      | 69.6 (31-198)                                         |
| <60 mL/min, n (%)                                           | 26 (23)                                            | 38 (33)                                               |
| <b>Median time from initial diagnosis, months (range)</b>   | 29.6 (0–192)                                       | 36.5 (0-480)                                          |

<sup>a</sup>Irrespective of del(17p), 4 of 112 patients in the ibrutinib plus obinutuzumab group and 5 of 110 patients in the chlorambucil plus obinutuzumab group had *TP53* mutations in the absence of del(17p). <sup>b</sup>Without del(17p); hierarchical categories according to Dohner classification.

ECOG, Eastern Cooperative Oncology Group; *IGHV*, immunoglobulin heavy-chain variable region; IQR, interquartile range.

**Table S2.** Patients who achieved MRD-negative response in peripheral blood or bone marrow

|                                                                           | <b>Ibrutinib<br/>plus obinutuzumab<br/>(n=113)</b> | <b>Chlorambucil<br/>plus obinutuzumab<br/>(n=116)</b> |
|---------------------------------------------------------------------------|----------------------------------------------------|-------------------------------------------------------|
| Patients with MRD test performed, n (%)                                   | 101 (89)                                           | 92 (79)                                               |
| Patients with PB or BM MRD negativity, n (%)                              | 43 (38)                                            | 29 (25)                                               |
| PB                                                                        | 37 (33)                                            | 23 (20)                                               |
| BM                                                                        | 28 (25)                                            | 20 (17)                                               |
| Patients with PB or BM MRD followed after first achieving negative, n (%) | 39 (91)                                            | 25 (86)                                               |
| Follow-up time after first achieving negative MRD, median (range)         | 23 (0.03-44)                                       | 30 (0.03-44)                                          |
| Number of patients remaining negative at last PB or BM sample, n (%)      | 26 (60)                                            | 9 (31)                                                |
| Number of patients with MRD relapsed in PB or BM, n (%)                   | 5 (12)                                             | 7 (24)                                                |
| Time to MRD relapse (months), median (range)                              | NE (0.03-44+)                                      | 37.5 (0.03-44+)                                       |

BM, bone marrow; MRD, minimal residual disease; NE, not estimable; PB, peripheral blood.

**Table S3.** Summary of most common AEs (≥10% of patients in either arm) during the TEAE period<sup>a</sup>

|                                      | Ibrutinib<br>plus obinutuzumab<br>(n=113) |                       |                     | Chlorambucil<br>plus obinutuzumab<br>(n=115) |                       |                     |
|--------------------------------------|-------------------------------------------|-----------------------|---------------------|----------------------------------------------|-----------------------|---------------------|
|                                      | Any<br>grade<br>n (%)                     | Grade<br>3-4<br>n (%) | Grade<br>5<br>n (%) | Any<br>grade<br>n (%)                        | Grade<br>3-4<br>n (%) | Grade<br>5<br>n (%) |
| Neutropenia                          | 50 (44)                                   | 41 (36)               | 0                   | 73 (63)                                      | 53 (46)               | 0                   |
| Thrombocytopenia                     | 40 (35)                                   | 22 (19)               | 0                   | 29 (25)                                      | 12 (10)               | 0                   |
| Diarrhea                             | 39 (35)                                   | 3 (3)                 | 0                   | 12 (10)                                      | 0                     | 0                   |
| Cough                                | 33 (29)                                   | 1 (1)                 | 0                   | 14 (12)                                      | 0                     | 0                   |
| Infusion-related<br>reaction         | 28 (25)                                   | 2 (2)                 | 0                   | 67 (58)                                      | 9 (8)                 | 0                   |
| Arthralgia                           | 27 (24)                                   | 1 (1)                 | 0                   | 12 (10)                                      | 0                     | 0                   |
| Pyrexia                              | 22 (19)                                   | 2 (2)                 | 0                   | 30 (26)                                      | 1 (1)                 | 0                   |
| Fatigue                              | 22 (19)                                   | 1 (1)                 | 0                   | 19 (17)                                      | 2 (2)                 | 0                   |
| Hypertension                         | 22 (19)                                   | 4 (4)                 | 0                   | 5 (4)                                        | 4 (3)                 | 0                   |
| Back pain                            | 21 (19)                                   | 0                     | 0                   | 12 (10)                                      | 1 (1)                 | 0                   |
| Anemia                               | 19 (17)                                   | 4 (4)                 | 0                   | 30 (26)                                      | 9 (8)                 | 0                   |
| Constipation                         | 19 (17)                                   | 0                     | 0                   | 14 (12)                                      | 1 (1)                 | 0                   |
| Upper respiratory<br>tract infection | 19 (17)                                   | 1 (1)                 | 0                   | 7 (6)                                        | 0                     | 0                   |
| Pneumonia                            | 18 (16)                                   | 9 (8)                 | 1 (1)               | 8 (7)                                        | 4 (3)                 | 1 (1)               |
| Rash maculo-<br>papular              | 17 (15)                                   | 2 (2)                 | 0                   | 2 (2)                                        | 0                     | 0                   |
| Atrial fibrillation                  | 17 (15)                                   | 7 (6)                 | 0                   | 0                                            | 0                     | 0                   |
| Muscle spasms                        | 16 (14)                                   | 0                     | 0                   | 7 (6)                                        | 0                     | 0                   |
| Nausea                               | 15 (13)                                   | 0                     | 0                   | 35 (30)                                      | 0                     | 0                   |
| Nasopharyngitis                      | 15 (13)                                   | 0                     | 0                   | 4 (3)                                        | 0                     | 0                   |
| Hyperuricemia                        | 15 (13)                                   | 1 (1)                 | 0                   | 0                                            | 0                     | 0                   |
| Edema peripheral                     | 14 (12)                                   | 0                     | 0                   | 8 (7)                                        | 0                     | 0                   |
| Urinary tract<br>infection           | 14 (12)                                   | 4 (4)                 | 0                   | 8 (7)                                        | 1 (1)                 | 0                   |
| Insomnia                             | 13 (12)                                   | 0                     | 0                   | 5 (4)                                        | 0                     | 0                   |
| Asthenia                             | 12 (11)                                   | 0                     | 0                   | 17 (15)                                      | 0                     | 0                   |
| Dyspnea                              | 12 (11)                                   | 2 (2)                 | 0                   | 15 (13)                                      | 1 (1)                 | 0                   |
| Vomiting                             | 12 (11)                                   | 0                     | 0                   | 14 (12)                                      | 0                     | 0                   |
| Pain in extremity                    | 12 (11)                                   | 1 (1)                 | 0                   | 10 (9)                                       | 2 (2)                 | 0                   |
| Dizziness                            | 12 (11)                                   | 0                     | 0                   | 7 (6)                                        | 0                     | 0                   |
| Conjunctivitis                       | 12 (11)                                   | 0                     | 0                   | 2 (2)                                        | 0                     | 0                   |
| Cataract                             | 12 (11)                                   | 2 (2)                 | 0                   | 1 (1)                                        | 0                     | 0                   |
| Headache                             | 9 (8)                                     | 0                     | 0                   | 13 (11)                                      | 1 (1)                 | 0                   |

AE, adverse event; SAE, serious adverse event; TEAE, treatment-emergent adverse event.

<sup>a</sup>TEAE period defined as time from first dose until 30 days after last dose of study drug or initiation of subsequent antitumor therapy, whichever occurred first. At final analysis,

median treatment exposure was 42.3 months in the ibrutinib plus obinutuzumab arm and 5.1 months in the chlorambucil plus obinutuzumab arm.

**Table S4. Summary of study discontinuation and deaths.**

|                                                      | <b>Ibrutinib plus obinutuzumab (n=113)</b> |                                         | <b>Chlorambucil plus obinutuzumab (n=116)</b> |                                         |
|------------------------------------------------------|--------------------------------------------|-----------------------------------------|-----------------------------------------------|-----------------------------------------|
| <b>All deaths, n (%)</b>                             | 21 (19)                                    |                                         | 21 (18)                                       |                                         |
| Adverse event                                        | 13 (12)                                    |                                         | 9 (8)                                         |                                         |
| Disease progression                                  | 2 (2)                                      |                                         | 4 (3)                                         |                                         |
| Unknown                                              | 5 (4)                                      |                                         | 3 (3)                                         |                                         |
| General health deterioration                         | 1 (0.01)                                   |                                         | 1 (0.01)                                      |                                         |
| Accident                                             | 0                                          |                                         | 1 (0.01)                                      |                                         |
| Acute kidney failure + sepsis                        | 0                                          |                                         | 1 (0.01)                                      |                                         |
| Gastric adenocarcinoma                               | 0                                          |                                         | 1 (0.01)                                      |                                         |
| Ischemic stroke                                      | 0                                          |                                         | 1 (0.01)                                      |                                         |
| <b>TEAEs leading to death</b>                        | <b>All death (n1 [%])*</b>                 | <b>Treatment-related n2<sup>†</sup></b> | <b>All death (n1 [%])</b>                     | <b>Treatment-related n2<sup>†</sup></b> |
| Any TEAE                                             | 14 (12)                                    | 5                                       | 3 (3)                                         | 1                                       |
| Cardiac disorders                                    | 2 (2)                                      | 0                                       | 0                                             | 0                                       |
| General disorders and administration site conditions | 3 (3)                                      | 2                                       | 0                                             | 0                                       |
| Infections and infestations                          | 5 (4)                                      | 3                                       | 2 (2)                                         | 0                                       |
| Neoplasms benign, malignant, and unspecified         | 2 (2)                                      | 0                                       | 1 (1)                                         | 1                                       |
| Suicide                                              | 1 (1)                                      | 0                                       | 0                                             | 0                                       |

\*n1; number of subjects with the specified event.

<sup>†</sup>n2; number of subjects with the specified event that were possibly related to study drug per investigator's judgement.
